# Supplementary material for: Design, synthesis, and anti-inflammatory activity of indole-2-formamide benzimidazole[2,1-b]thiazole derivatives
Source: PubMed Central journal article supplement — RSC Adv. 2024 May 29;14(23):16349–57. doi: 10.1039/d4ra00557k (PMC11134322; doi:10.1039/d4ra00557k), 2024-05-29
Supplement: RA-014-D4RA00557K-s001.pdf [file RA-014-D4RA00557K-s001.pdf]

Electronic Supplementary Material (ESI) for RSC Advances. This journal is © The Royal Society of Chemistry 2024

## Supporting Information

### Design, Synthesis and Anti-inflammatory activity research of Indole-2-formamide Benzimidazole [2,1-b] thiazole Derivatives

Hai-Feng Lin <sup>a</sup>, Yu-Cai Jiang<sup>\*b</sup>, Zhi-Wei Chen <sup>c</sup> and Lin-Lin Zheng <sup>d</sup>

---

*a. Department of Gastroenterology, Affiliated Hospital of Putian University, Putian, China.*

*b. Department of Pharmacy, Affiliated Hospital of Putian University, Putian, China.*

*c. Department of Pathology, Affiliated Hospital of Putian University, Putian, China.*

*d. Department of oncology, Affiliated Hospital of Putian University, Putian, China*

**\*Corresponding author, email: [jiangyucai2030@ptu.edu.cn](mailto:jiangyucai2030@ptu.edu.cn)**

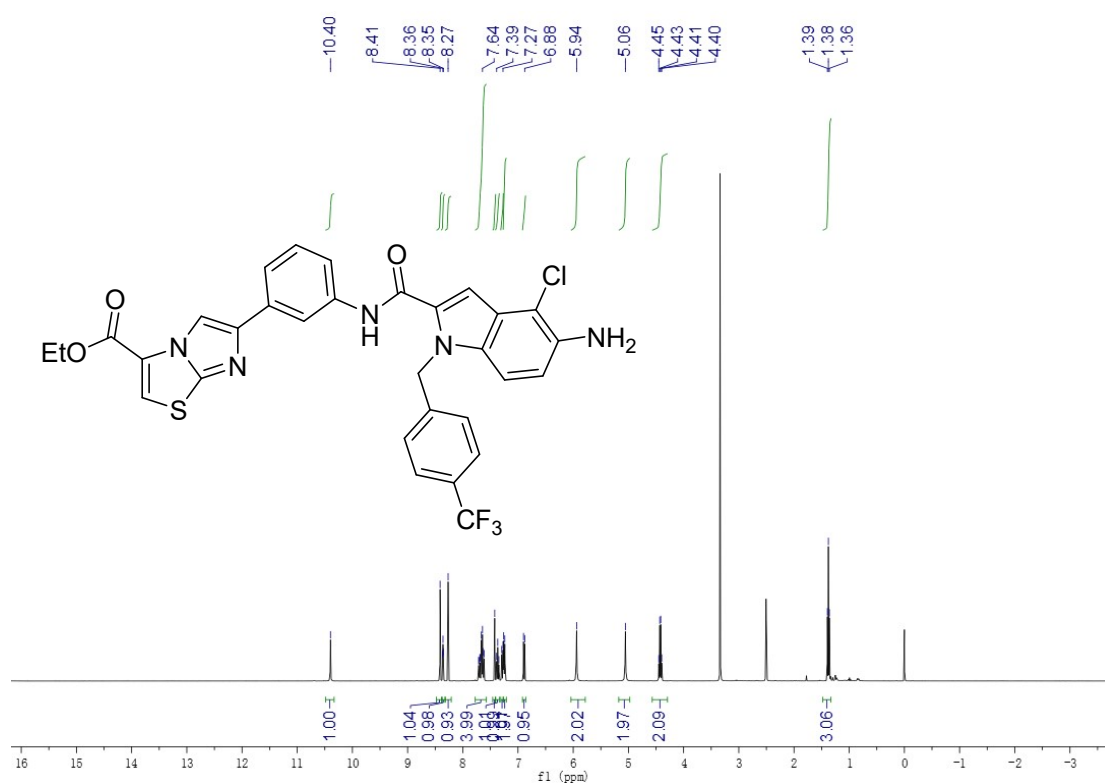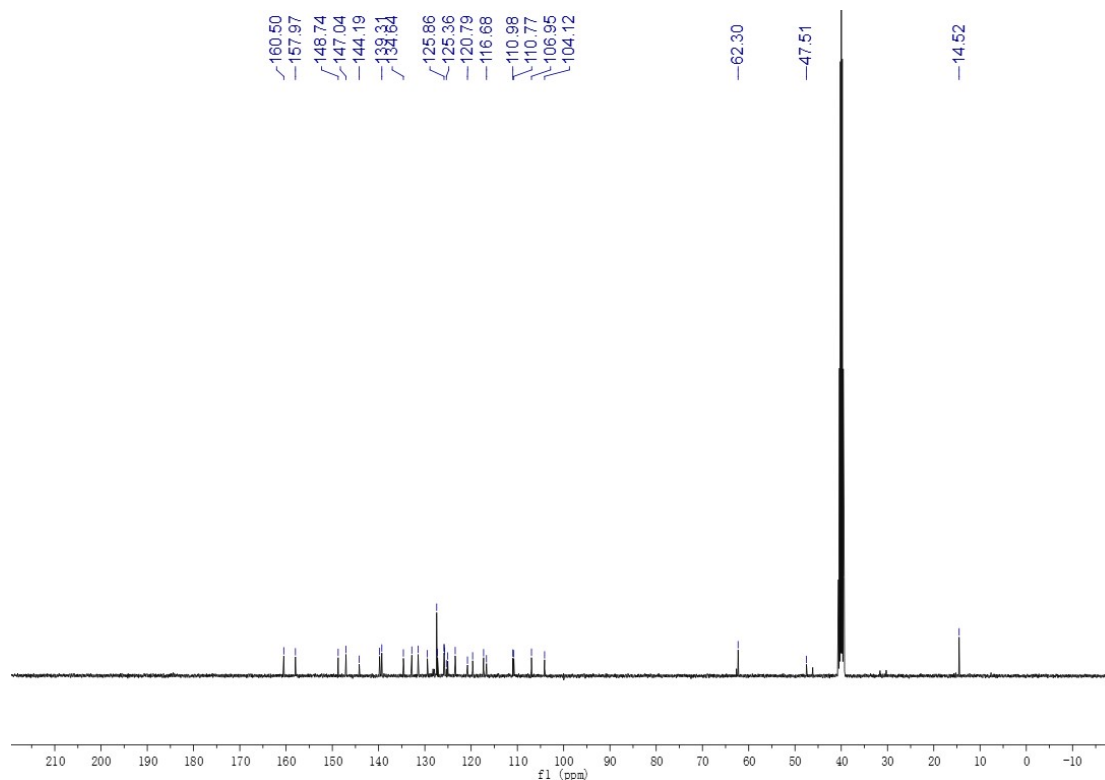

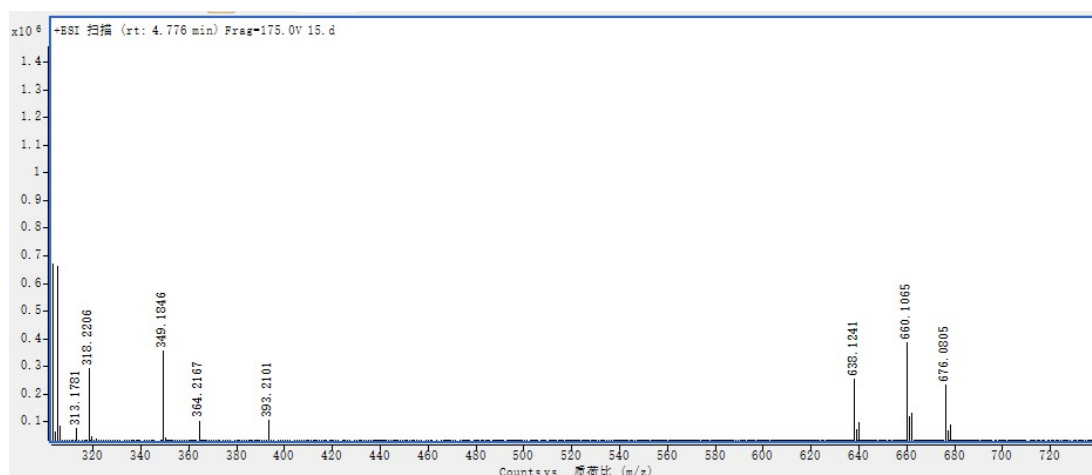

Figure 3: HR-ESI-MS spectrum of ethyl 6-(3-(5-amino-4-chloro-1-(4-(trifluoromethyl) benzyl)-1*H*-indole-2-carboxamido) phenyl) imidazole [2,1-*b*] thiazole-3-carboxylate (**12**)

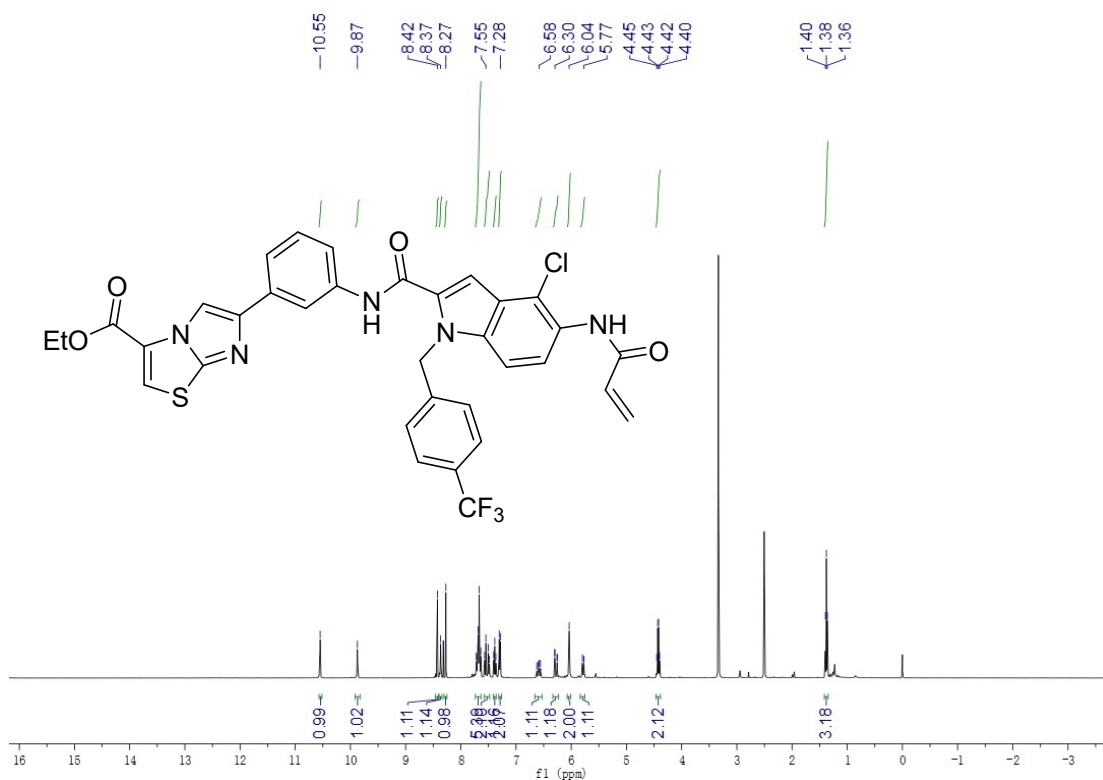

Figure 4:  $^1\text{H}$  NMR (400 MHz,  $\text{DMSO-}d_6$ ) spectrum of ethyl 6-(3-(5-acrylamido-4-chloro-1-(4-(trifluoromethyl) benzyl)-1*H*-indole-2-carboxamido) phenyl) imidazole [2,1-*b*] thiazole-3-carboxylate (**13a**)

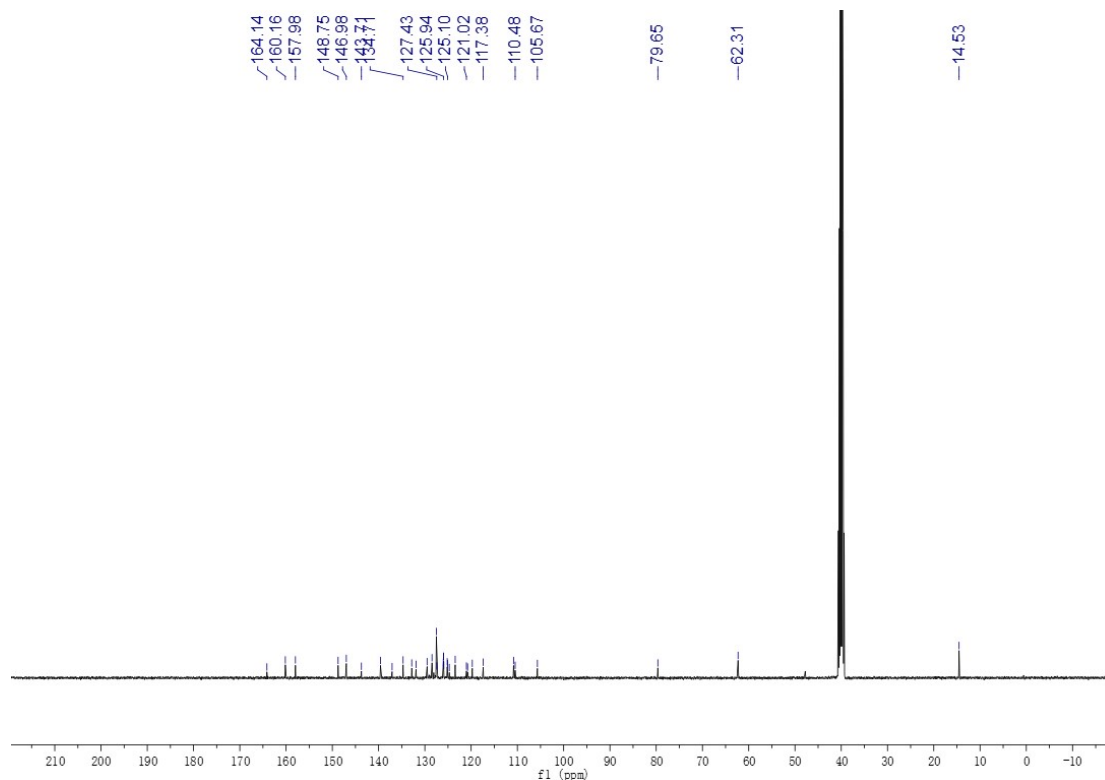

Figure 5:  $^{13}\text{C}$  NMR (101 MHz, DMSO) spectrum of ethyl6-(3-(5-acrylamido-4-chloro-1-(4-(trifluoromethyl) benzyl)-1*H*-indole-2-carboxamido) phenyl) imidazole [2,1-*b*] thiazole-3-carboxylate (**13a**)

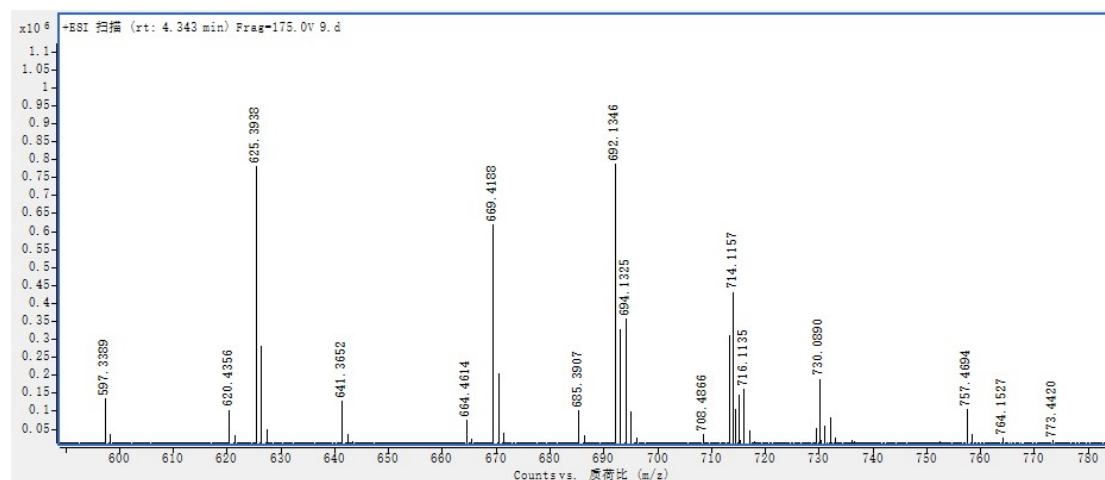

Figure 6: HR-ESI-MS spectrum of ethyl6-(3-(5-acrylamido-4-chloro-1-(4-(trifluoromethyl) benzyl)-1*H*-indole-2-carboxamido) phenyl) imidazole [2,1-*b*] thiazole-3-carboxylate (**13a**)

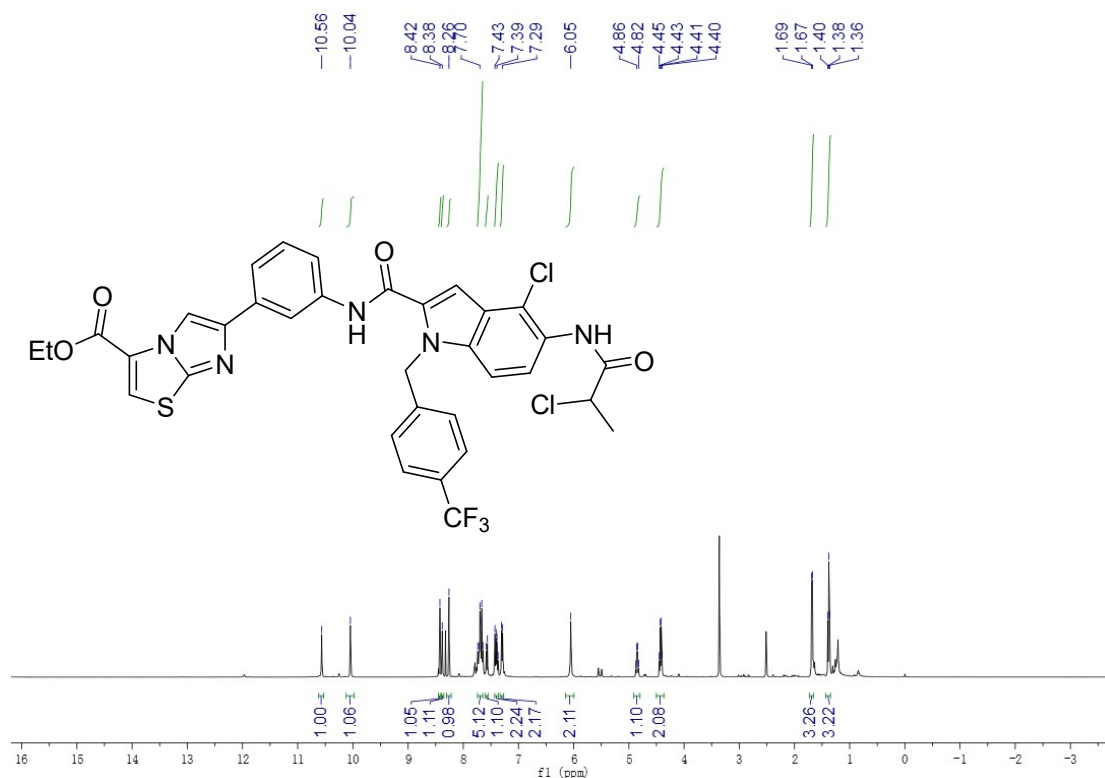

Figure 7: <sup>1</sup>H NMR (400 MHz, DMSO-*d*<sub>6</sub>) spectrum of ethyl 6-(3-(4-chloro-5-(2-chloropropanamido)-1-(4-(trifluoromethyl) benzyl)-1H-indole-2-carboxamido) phenyl) imidazole [2,1-*b*] thiazole-3-carboxylate (**13b**)

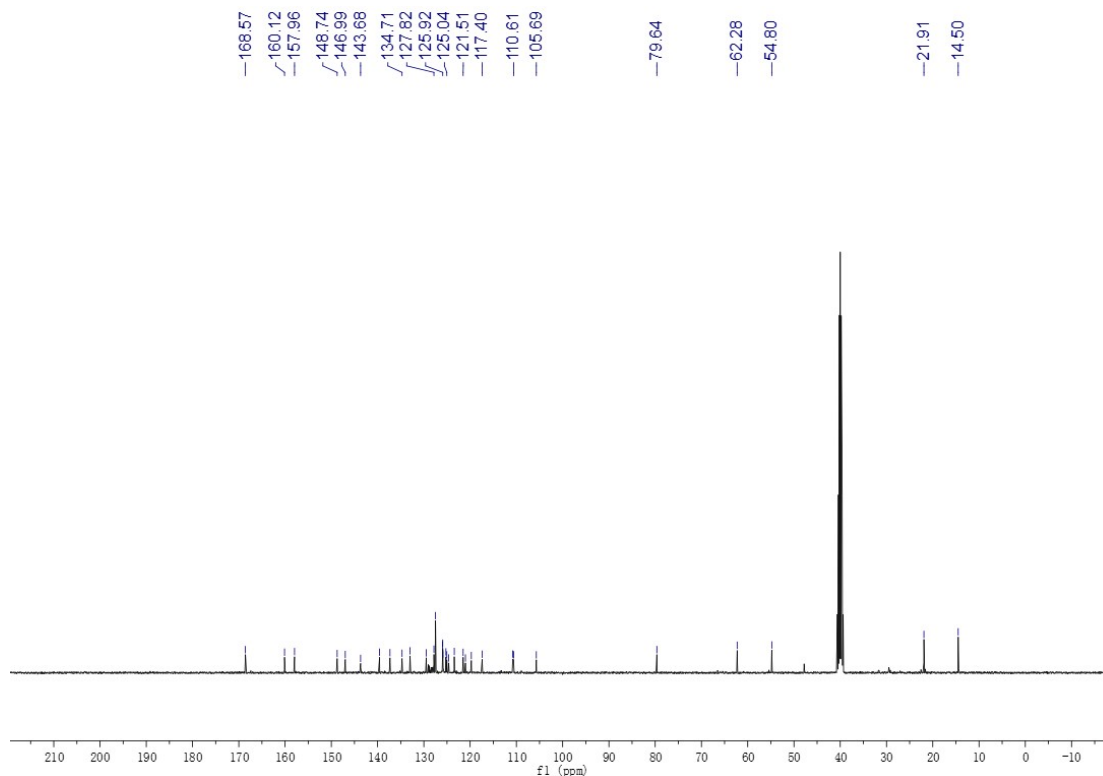

Figure 8: <sup>13</sup>C NMR (101 MHz, DMSO) spectrum of ethyl 6-(3-(4-chloro-5-(2-chloropropanamido)-1-(4-(trifluoromethyl) benzyl)-1H-indole-2-carboxamido) phenyl) imidazole [2,1-*b*] thiazole-3-carboxylate (**13b**)

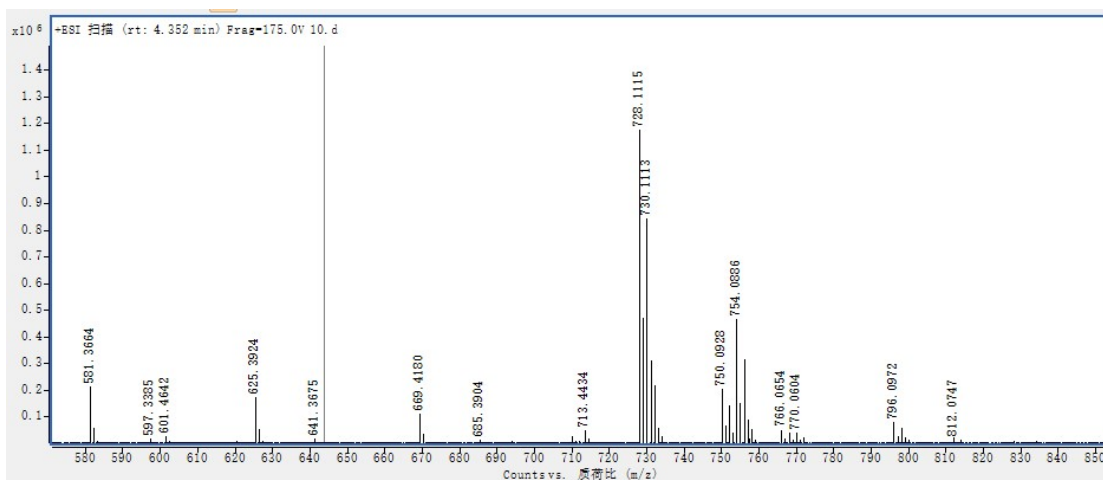

Figure 9: HR-ESI-MS spectrum of ethyl 6-(3-(4-chloro-5-(2-chloropropanamido)-1-(4-(trifluoromethyl)benzyl)-1*H*-indole-2-carboxamido)phenyl)imidazole [2,1-*b*]thiazole-3-carboxylate (**13b**)

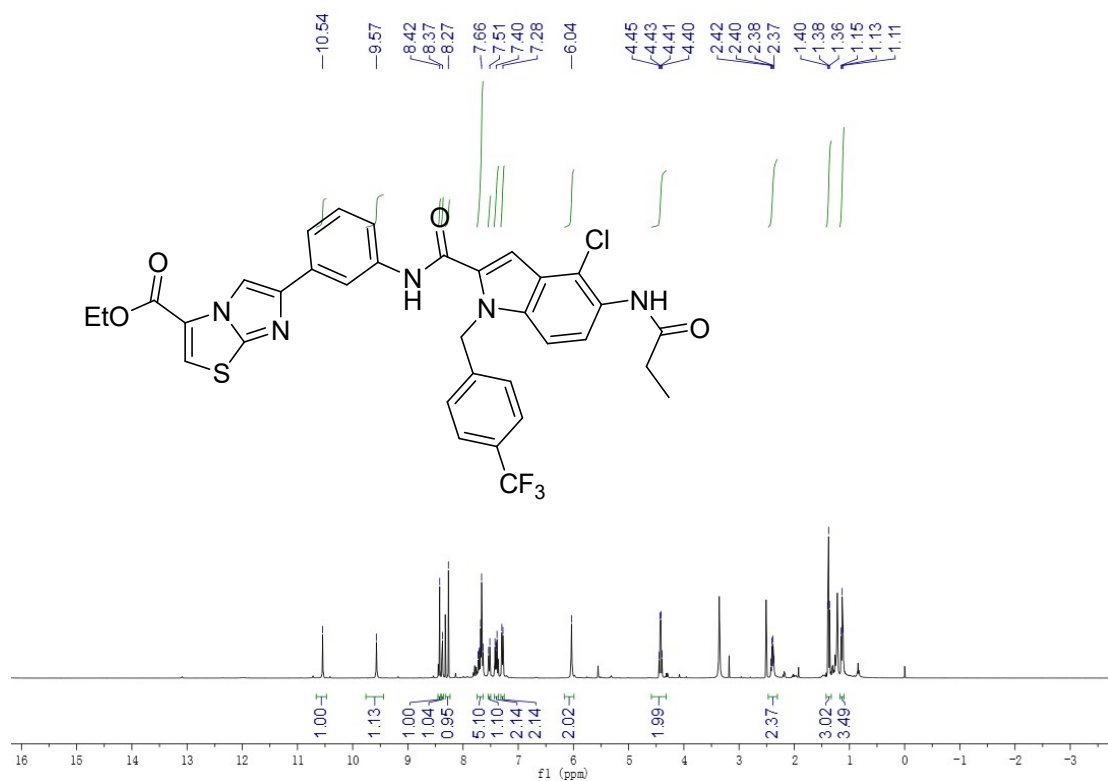

Figure 10:  $^1\text{H}$  NMR (400 MHz,  $\text{DMSO-}d_6$ ) spectrum of ethyl 6-(3-(4-chloro-5-propionamido-1-(4-(trifluoromethyl)benzyl)-1*H*-indole-2-carboxamido)phenyl)imidazole [2,1-*b*]thiazole-3-carboxylate (**13c**)

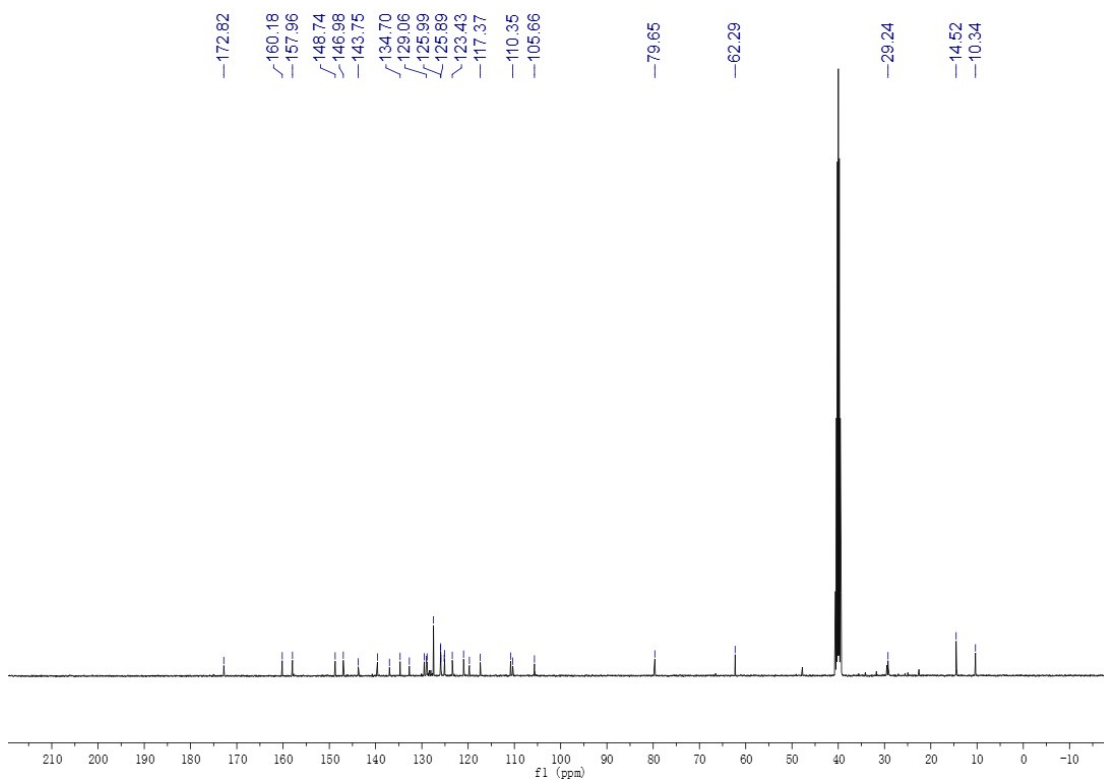

Figure 11:  $^{13}\text{C}$  NMR (101 MHz, DMSO) spectrum of ethyl 6-(3-(4-chloro-5-propionamido-1-(4-(trifluoromethyl) benzyl)-1*H*-indole-2-carboxamido) phenyl) imidazole [2,1-*b*] thiazole-3-carboxylate (**13c**)

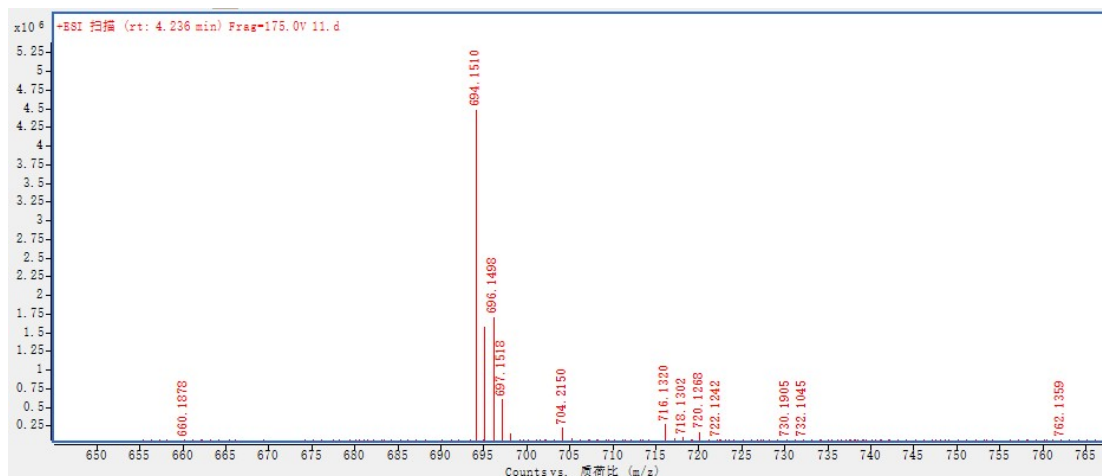

Figure 12: HR-ESI-MS spectrum of ethyl 6-(3-(4-chloro-5-propionamido-1-(4-(trifluoromethyl) benzyl)-1*H*-indole-2-carboxamido) phenyl) imidazole [2,1-*b*] thiazole-3-carboxylate (**13c**)

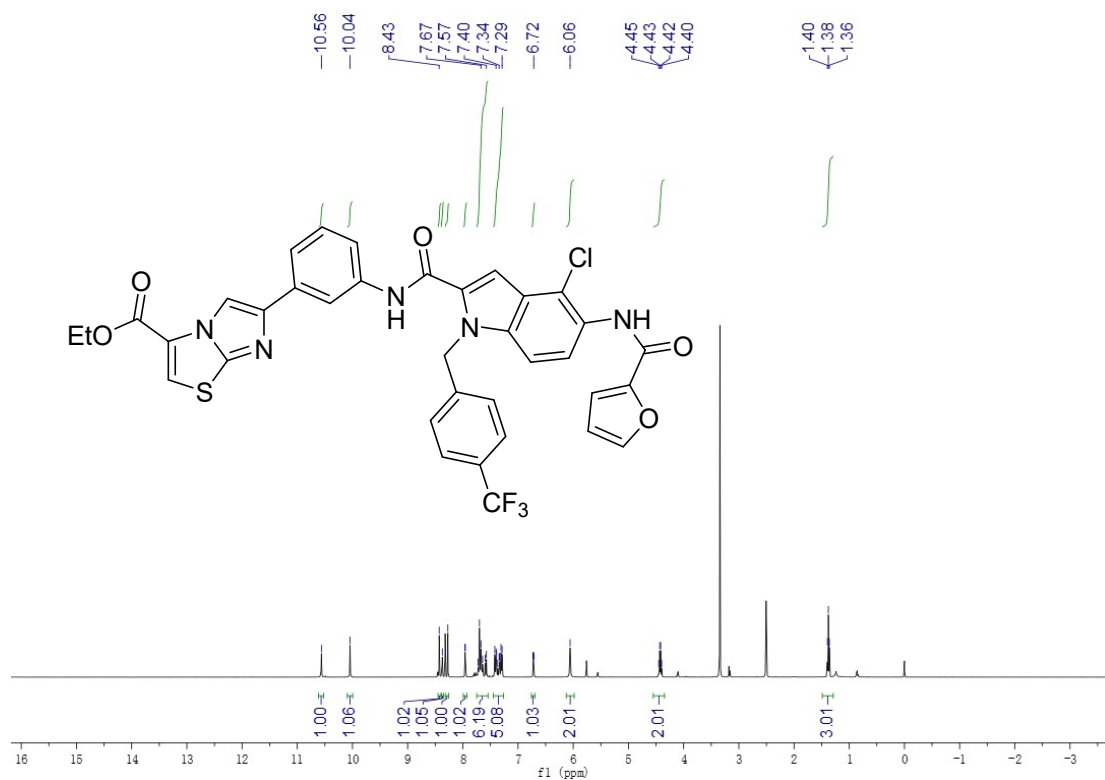

Figure 13: <sup>1</sup>H NMR (400 MHz, DMSO-*d*<sub>6</sub>) spectrum of ethyl 6-(3-(4-chloro-5-(furan-2-carboxamido)-1-(4-(trifluoromethyl) benzyl)-1H-indole-2-carboxamido) phenyl) imidazole [2,1-*b*] thiazole-3-carboxylate (**13d**)

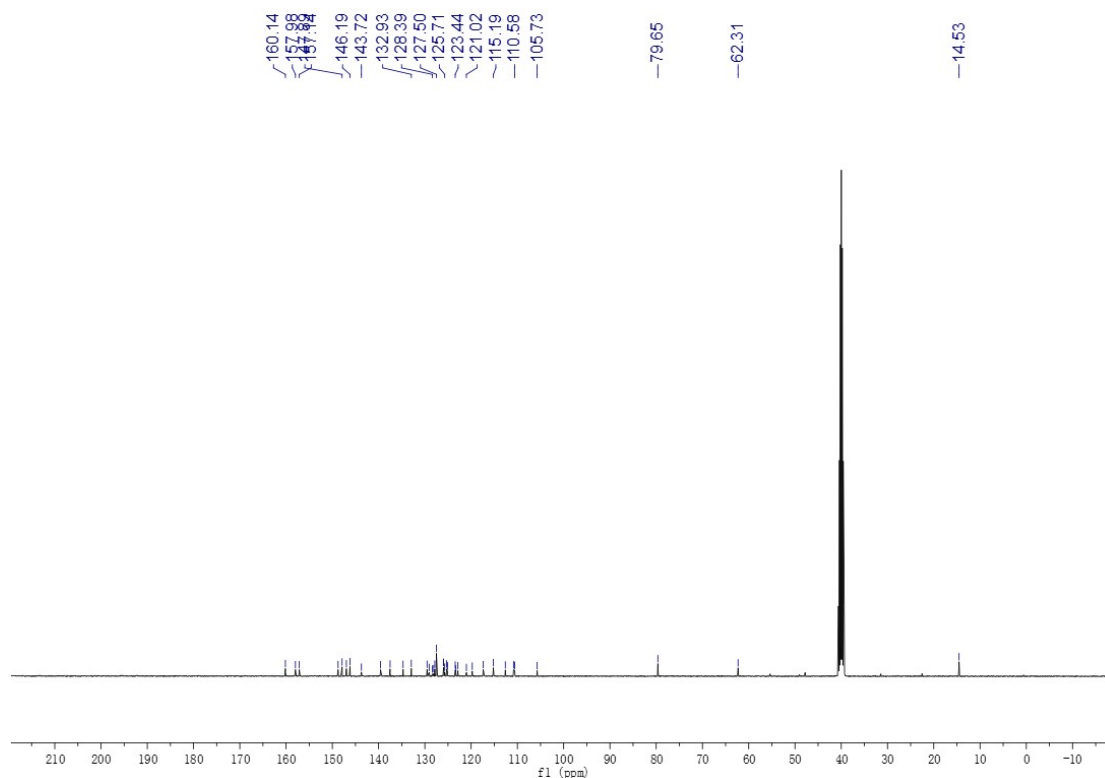

Figure 14: <sup>13</sup>C NMR (101 MHz, DMSO) spectrum of ethyl 6-(3-(4-chloro-5-(furan-2-carboxamido)-1-(4-(trifluoromethyl) benzyl)-1H-indole-2-carboxamido) phenyl) imidazole [2,1-*b*] thiazole-3-carboxylate (**13d**)



Imidazole [2,1-*b*] thiazole-3-carboxylate (**13d**)

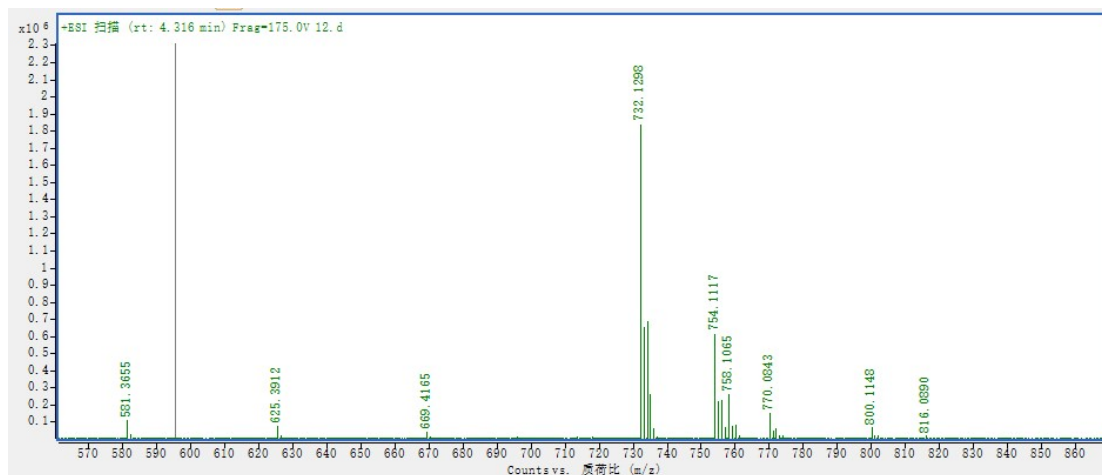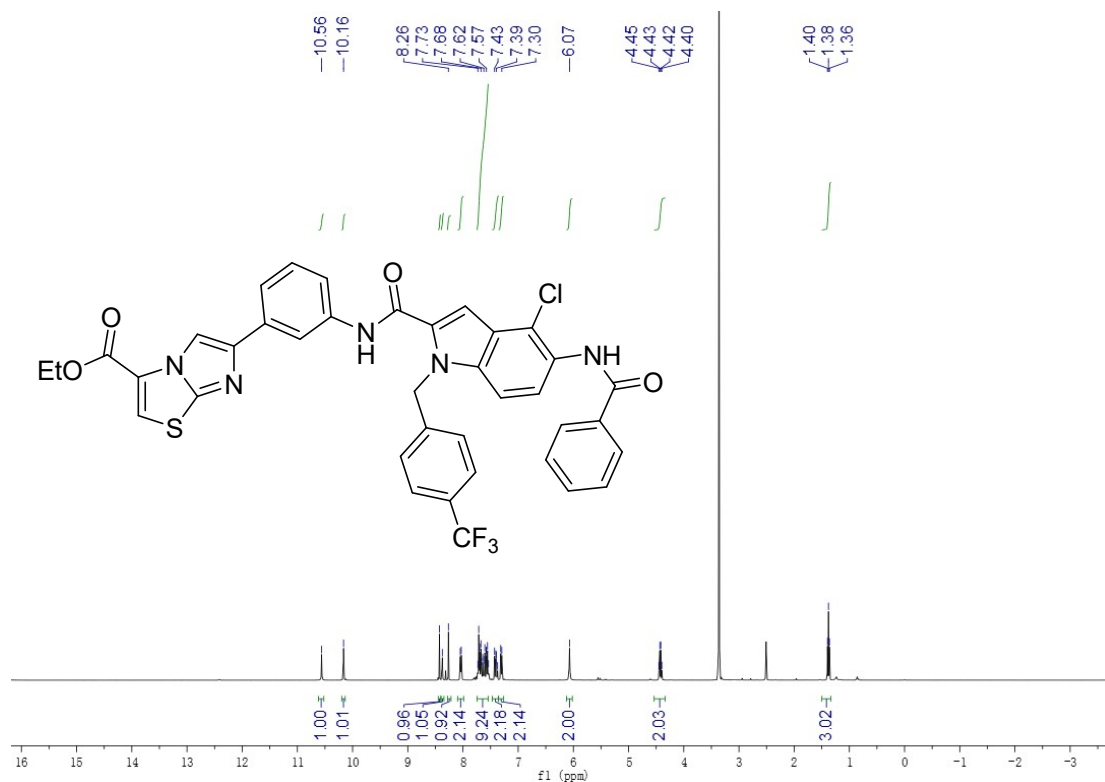

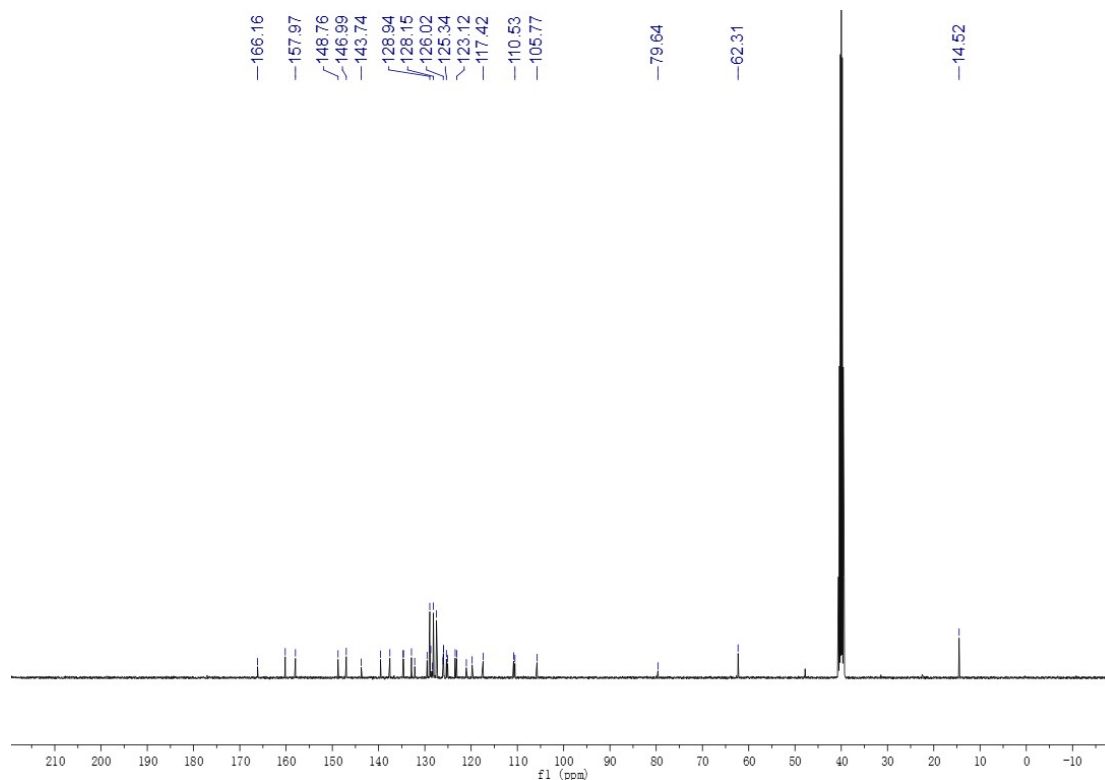

Figure 17:  $^{13}\text{C}$  NMR (101 MHz, DMSO) spectrum of ethyl 6-(3-(5-benzamido-4-chloro-1-(4-(trifluoromethyl) benzyl)-1*H*-indole-2-carboxamido)phenyl) imidazole [2,1-*b*] thiazole-3-carboxylate (**13e**)

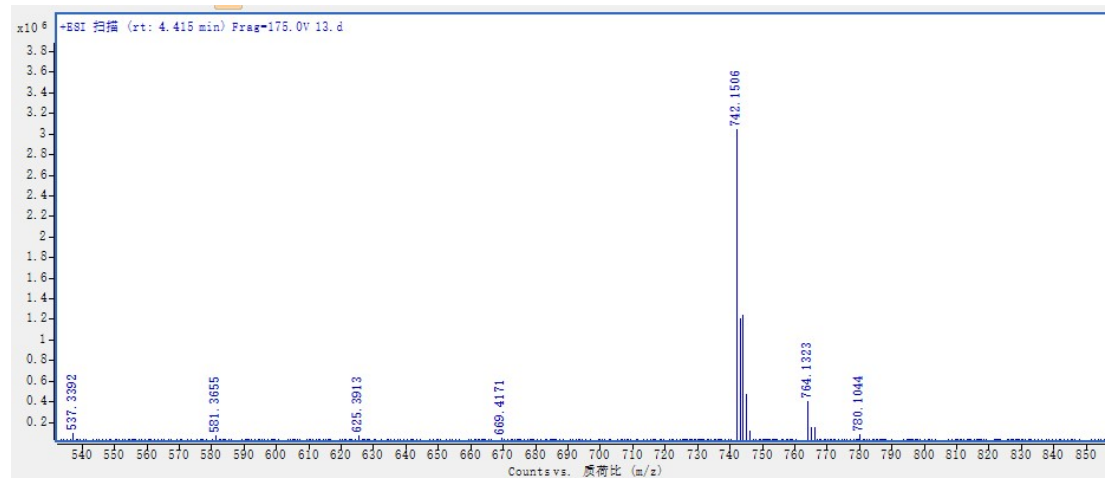

Figure 18: HR-ESI-MS spectrum of ethyl 6-(3-(5-benzamido-4-chloro-1-(4-(trifluoromethyl) benzyl)-1*H*-indole-2-carboxamido)phenyl) imidazole [2,1-*b*] thiazole-3-carboxylate (**13e**)

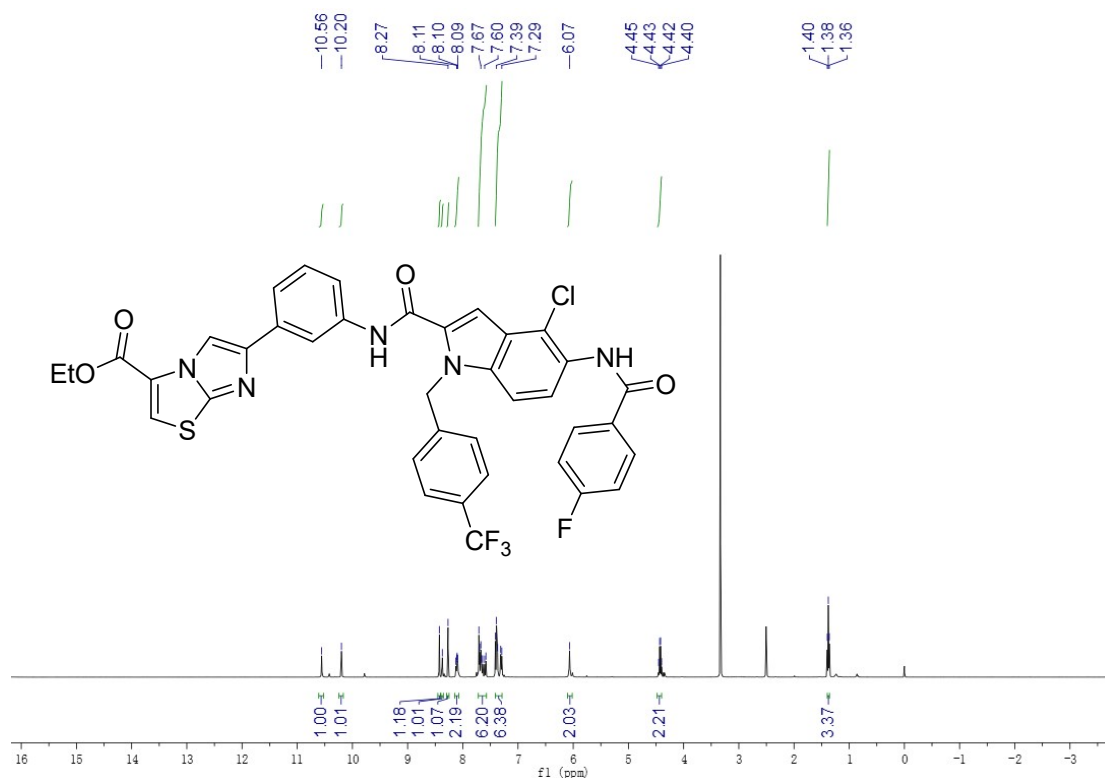

Figure 19:  $^1\text{H}$  NMR (400 MHz,  $\text{DMSO-}d_6$ ) spectrum of ethyl 6-(3-(4-chloro-5-(4-fluorobenzamido)-1-(4-(trifluoromethyl)benzyl)-1H-indole-2-carboxamido) phenyl)imidazole [2,1-*b*] thiazole-3-carboxylate (**13f**)

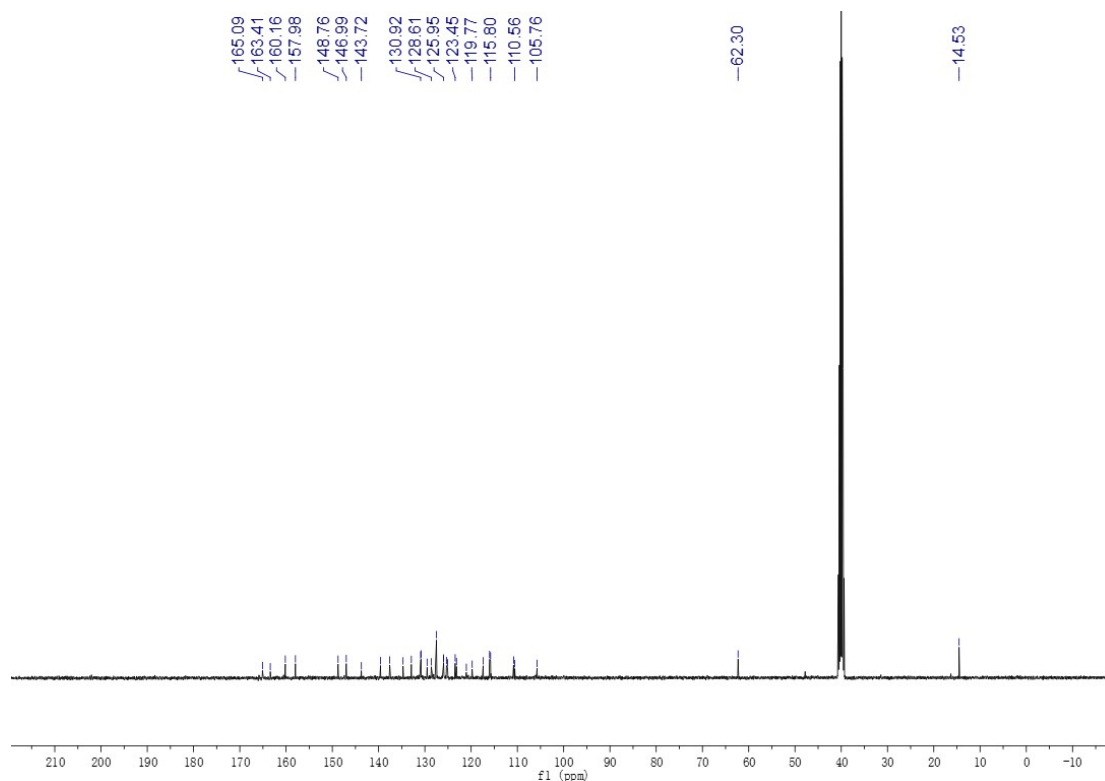

Figure 20:  $^{13}\text{C}$  NMR (101 MHz,  $\text{DMSO}$ ) spectrum of ethyl 6-(3-(4-chloro-5-(4-fluorobenzamido)-1-(4-(trifluoromethyl)benzyl)-1H-indole-2-carboxamido) phenyl)imidazole [2,1-*b*] thiazole-3-carboxylate (**13f**)

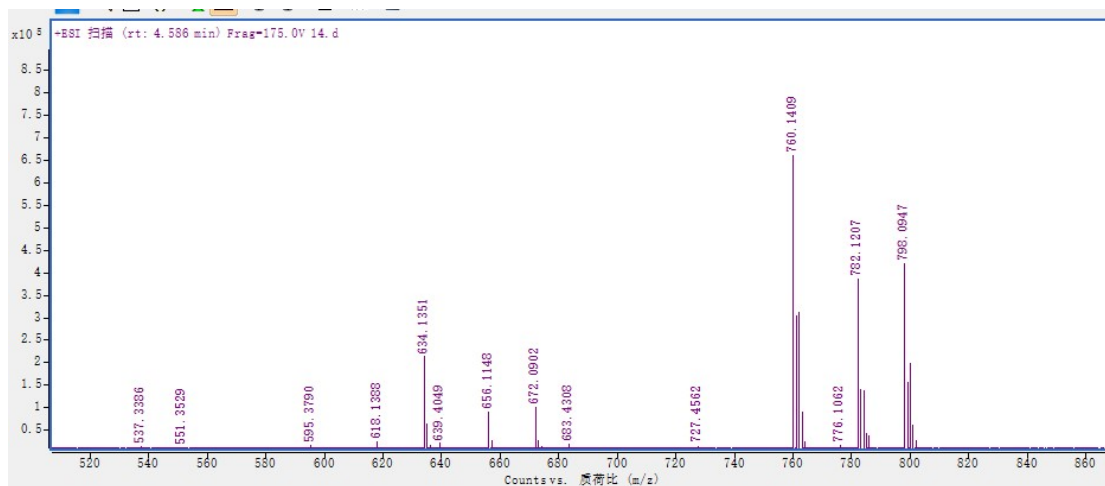

Figure 21: HR-ESI-MS spectrum of ethyl 6-(3-(4-chloro-5-(4-fluorobenzamido)-1-(4-(trifluoromethyl)benzyl)-1*H*-indole-2-carboxamido) phenyl) imidazole [2,1-*b*] thiazole-3-carboxylate (**13f**)
